# Supplementary material for: Microscopic, Stereological, and Biochemical Investigation of the Effects of Vitamin B12 on Vascular Changes in an Experimental Subarachnoid Hemorrhage Model in Rats
Source: Research Square preprint supplement (doi:10.21203/rs.3.rs-5983898/v1), 2025-02-21
Supplement: Supplementary file 1 [file 4eab78b9227e87307b9b42ae.docx]

| **Table-2** | | | | | | | | | | | | | | | |
| --- | --- | --- | --- | --- | --- | --- | --- | --- | --- | --- | --- | --- | --- | --- | --- |
|  |  |  | ¹Control Group (n=6) | | |  | ²SAH Group (n=6) | | |  | ³SAH+B12 Group (n=6) | | | p | |
| **Basilar Artery Diameter (mm)** | **Mean ± SD** | | 153.0 | ± | 47.5 |  | 127.8 | ± | 34.6 |  | 140.7 | ± | 12.3 | 0.476 | K |
| **Median** | | 147.0 | | |  | 132.0 | | |  | 137.8 | | |
| **Arterial Wall Thickness (mm)** | **Mean ± SD** | | 40.1 | ± | 13.2 |  | 40.5 | ± | 12.1 |  | 33.5 | ± | 4.6 | 0.519 | K |
| **Median** | | 35.1 | | |  | 36.4 | | |  | 33.1 | | |
| **Total Oxidant Status (TOS)** | **Mean ± SD** | | 3.0 | ± | 0.1 |  | 7.6 | ± | 1.4 |  | 6.3 | ± | 0.6 | ***0.002*** | K |
| **Median** | | 3.0²³ | | |  | 7.0 | | |  | 6.6 | | |
| **Total Antioxidant Status (TAS)** | **Mean ± SD** | | 0.77 | ± | 0.05 |  | 0.43 | ± | 0.18 |  | 0.57 | ± | 0.06 | ***0.002*** | K |
| **Median** | | 0.78 | | |  | 0.47¹ | | |  | 0.658¹ | | |
| **Oxidative Stress Index (OSI)** | **Mean ± SD** | | 3.9 | ± | 0.2 |  | 21.2 | ± | 11.1 |  | 11.3 | ± | 2.1 | ***0.001*** | K |
| **Median** | | 3.9²³ | | |  | 15.1 | | |  | 11.4² | | |
| **Interleukin-1 Beta (pg/mL)** | **Mean ± SD** | | 6.0 | ± | 1.0 |  | 10.0 | ± | 0.8 |  | 8.8 | ± | 1.0 | ***0.001*** | K |
| **Median** | | 6.3²³ | | |  | 10.1 | | |  | 8.8 | | |
| **Interleukin-6 (pg/mL)** | **Mean ± SD** | | 1.8 | ± | 0.2 |  | 4.8 | ± | 0.3 |  | 4.0 | ± | 0.6 | ***0.001*** | K |
| **Median** | | 1.8²³ | | |  | 4.7 | | |  | 3.9² | | |
| **Tumor Necrosis Factor Alpha (pg/mL)** | **Mean ± SD** | | 52.8 | ± | 10.8 |  | 125.8 | ± | 11.8 |  | 109.5 | ± | 11.9 | ***0.001*** | K |
| **Median** | | 54.1²³ | | |  | 125.8 | | |  | 105.1 | | |
| **Hypoxia-Inducible Factor 1 Alpha (ng/mL)** | **Mean ± SD** | | 0.46 | ± | 0.10 |  | 0.95 | ± | 0.09 |  | 0.90 | ± | 0.17 | ***0.003*** | K |
| **Median** | | 0.47²³ | | |  | 0.95 | | |  | 0.90 | | |
| **Cytokeratin 18-M65 (U/L)** | **Mean ± SD** | | 152.7 | ± | 37.3 |  | 357.1 | ± | 78.5 |  | 321.1 | ± | 25.3 | ***0.002*** | K |
| **Median** | | 143.1²³ | | |  | 351.3 | | |  | 312.9 | | |

**K**Kruskal-Wallis (Mann-Whitney U test)

¹Significant difference compared to the Control Group (**p < 0.05**)

²Significant difference compared to the SAH Group (**p < 0.05**)

³Significant difference compared to the SAH + B12 Group (**p < 0.05**).
