# Supplementary material for: Microscopic, Stereological, and Biochemical Investigation of the Effects of Vitamin B12 on Vascular Changes in an Experimental Subarachnoid Hemorrhage Model in Rats
Source: Research Square preprint supplement (doi:10.21203/rs.3.rs-5983898/v1), 2025-02-21
Supplement: Supplementary file 2 [file 591eca122445a93a95cc28a3.docx]

| **Table-3** | | | | | | | | | | | | | | | |
| --- | --- | --- | --- | --- | --- | --- | --- | --- | --- | --- | --- | --- | --- | --- | --- |
|  |  |  | ¹Control Group (n=6) | | |  | ²SAH Group (n=6) | | |  | ³SAH+B12 Group (n=6) | | | p | |
| ***Serum*** | |  |  |  |  |  |  |  |  |  |  |  |  |  |  |
| Total Oxidant Status | Mean ± SD | | 5.7 | ± | 1.8 |  | 9.6 | ± | 0.5 |  | 8.1 | ± | 0.9 | ***0.002*** | K |
| Median | | 5.5²³ | | |  | 9.4 | | |  | 8.3² | | |
| Total Antioxidant Status | Mean ± SD | | 1.03 | ± | 0.17 |  | 0.46 | ± | 0.07 |  | 0.55 | ± | 0.07 | ***0.002*** | K |
| Median | | 1.10 | | |  | 0.45¹ | | |  | 0.53¹ | | |
| Oxidative Stress Index | Mean ± SD | | 5.8 | ± | 2.5 |  | 21.5 | ± | 3.4 |  | 15.2 | ± | 3.1 | ***0.001*** | K |
| Median | | 4.8²³ | | |  | 21.6 | | |  | 16.1² | | |
| Interleukin-1 Beta (pg/mL) | Mean ± SD | | 9.2 | ± | 2.1 |  | 25.1 | ± | 2.7 |  | 21.2 | ± | 3.5 | ***0.001*** | K |
| Median | | 8.1²³ | | |  | 25.9 | | |  | 22.4 | | |
| Interleukin-6 (pg/mL) | Mean ± SD | | 10.0 | ± | 5.2 |  | 27.7 | ± | 2.4 |  | 21.9 | ± | 1.7 | ***0.001*** | K |
| Median | | 8.5²³ | | |  | 28.6 | | |  | 22.7² | | |
| Tumor Necrosis Factor Alpha (pg/mL) | Mean ± SD | | 125.1 | ± | 28.1 |  | 339.1 | ± | 56.2 |  | 311.1 | ± | 30.4 | ***0.002*** | K |
| Median | | 123.9²³ | | |  | 346.4 | | |  | 327.9 | | |
| Hypoxia-Inducible Factor 1 Alpha (ng/mL) | Mean ± SD | | 1.7 | ± | 0.1 |  | 5.0 | ± | 0.8 |  | 4.0 | ± | 0.6 | ***0.001*** | K |
| Median | | 1.6²³ | | |  | 5.2 | | |  | 3.9² | | |
| Cytokeratin 18-M65 (U/L) | Mean ± SD | | 128.8 | ± | 21.4 |  | 382.9 | ± | 49.4 |  | 335.6 | ± | 54.6 | ***0.002*** | K |
| Median | | 135.9²³ | | |  | 384.1 | | |  | 337.6 | | |
| Total Thiol (µmol/L) | Mean ± SD | | 481.2 | ± | 46.5 |  | 284.8 | ± | 49.4 |  | 327.4 | ± | 42.4 | ***0.002*** | K |
| Median | | 467.2 | | |  | 276.2¹ | | |  | 323.9¹ | | |
| Native Thiol (µmol/L) | Mean ± SD | | 356.8 | ± | 26.8 |  | 76.6 | ± | 4.8 |  | 122.7 | ± | 7.6 | ***0.001*** | K |
| Median | | 358.6 | | |  | 76.0¹³ | | |  | 123.3¹ | | |
| Disulfide (µmol/L) | Mean ± SD | | 62.2 | ± | 19.1 |  | 104.1 | ± | 24.1 |  | 102.3 | ± | 19.9 | ***0.015*** | K |
| Median | | 58.7²³ | | |  | 100.7 | | |  | 104.9 | | |
| % Native Thiol / Total Thiol | Mean ± SD | | 74.5 | ± | 6.2 |  | 27.5 | ± | 4.4 |  | 37.9 | ± | 4.9 | ***0.001*** | K |
| Median | | 75.4 | | |  | 27.2¹³ | | |  | 36.5¹ | | |
| % Disulfide / Total Thiol | Mean ± SD | | 12.8 | ± | 3.1 |  | 36.3 | ± | 2.2 |  | 31.0 | ± | 2.5 | ***0.001*** | K |
| Median | | 12.3²³ | | |  | 36.4 | | |  | 31.7² | | |
| % Disulfide / Native Thiol | Mean ± SD | | 17.5 | ± | 5.7 |  | 135.9 | ± | 30.0 |  | 83.5 | ± | 15.7 | ***0.001*** | K |
| Median | | 16.4²³ | | |  | 134.4 | | |  | 87.0² | | |

**K**Kruskal-Wallis (Mann-Whitney U test).

¹Significant difference compared to the Control Group (**p < 0.05**).

²Significant difference compared to the SAH Group (**p < 0.05**).

³Significant difference compared to the SAH + B12 Group (**p < 0.05**).
