# Supplementary material for: Microscopic, Stereological, and Biochemical Investigation of the Effects of Vitamin B12 on Vascular Changes in an Experimental Subarachnoid Hemorrhage Model in Rats
Source: Research Square preprint supplement (doi:10.21203/rs.3.rs-5983898/v1), 2025-02-21
Supplement: Supplementary file 3 [file 9e3dce4dbcdd6129a0471e42.docx]

| **Table-1** | | | | | | | | |
| --- | --- | --- | --- | --- | --- | --- | --- | --- |
|  |  | Min-Max | | | Median | Mean ± SD/n-% | | |
| | Basilar Artery Diameter (µm) | | --- | | | 89.3 | - | 226.8 | 136.1 | 140.5 | ± | 34.2 |
| | Arterial Wall Thickness (µm) | | --- | | | 24.5 | - | 62.1 | 35.1 | 38.0 | ± | 10.5 |
| | Total Oxidant Status (TOS) | | --- | | | 2.8 | - | 9.8 | 6.4 | 5.6 | ± | 2.1 |
| | Total Antioxidant Status (TAS) | | --- | | | 0.2 | - | 0.8 | 0.6 | 0.6 | ± | 0.2 |
| | Oxidative Stress Index (OSI) | | --- | | | 3.7 | - | 38.1 | 11.4 | 12.1 | ± | 9.5 |
| | Interleukin-1 Beta (IL-1β) | | --- | | | 4.4 | - | 10.9 | 8.5 | 8.3 | ± | 1.9 |
| | Interleukin-6 (IL-6) | | --- | | | 1.6 | - | 5.2 | 3.9 | 3.5 | ± | 1.3 |
| | Tumor Necrosis Factor Alpha (TNF-α) | | --- | | | 37.3 | - | 142.4 | 105.1 | 96.0 | ± | 33.9 |
| | Hypoxia-Inducible Factor 1 Alpha (HIF-1α) | | --- | | | 0.3 | - | 1.2 | 0.8 | 0.8 | ± | 0.3 |
| | Cytokeratin 18-M65 (CK18-M65) | | --- | | | 110.3 | - | 490.9 | 309.1 | 277.0 | ± | 104.0 |
| ***Serum*** | |  |  |  |  |  |  |  |
| | Total Oxidant Status (TOS) | | --- | | | 3.9 | - | 10.5 | 8.6 | 7.8 | ± | 2.0 |
| | Total Antioxidant Status (TAS) | | --- | | | 0.3 | - | 1.2 | 0.6 | 0.7 | ± | 0.3 |
| | Oxidative Stress Index (OSI) | | --- | | | 3.5 | - | 27.2 | 16.1 | 14.2 | ± | 7.2 |
| | Interleukin-1 Beta (IL-1β) | | --- | | | 7.3 | - | 27.7 | 21.2 | 18.5 | ± | 7.4 |
| | Interleukin-6 (IL-6) | | --- | | | 5.4 | - | 29.9 | 22.7 | 19.9 | ± | 8.2 |
| | Tumor Necrosis Factor Alpha (TNF-α) | | --- | | | 91.8 | - | 409.8 | 289.5 | 258.4 | ± | 104.8 |
| | Hypoxia-Inducible Factor 1 Alpha (HIF-1α) | | --- | | | 1.6 | - | 5.8 | 3.7 | 3.6 | ± | 1.5 |
| | Cytokeratin 18-M65 (CK18-M65) | | --- | | | 88.1 | - | 444.9 | 316.1 | 282.4 | ± | 120.9 |
| | Total Thiol (µmol/L) | | --- | | | 223.8 | - | 569.1 | 349.5 | 364.4 | ± | 97.0 |
| | Native Thiol (µmol/L) | | --- | | | 70.2 | - | 393.4 | 123.3 | 185.4 | ± | 127.2 |
| | Disulfide (µmol/L) | | --- | | | 41.5 | - | 141.7 | 89.8 | 89.5 | ± | 28.1 |
| | % Native Thiol / Total Thiol | | --- | | | 21.7 | - | 80.9 | 36.5 | 46.6 | ± | 21.3 |
| | % Disulfide / Total Thiol | | --- | | | 9.5 | - | 39.1 | 31.7 | 26.7 | ± | 10.6 |
| | % Disulfide / Native Thiol | | --- | | | 11.8 | - | 180.2 | 87.0 | 79.0 | ± | 53.2 |
| Group | Control |  |  |  |  | 6 |  | 33.3% |
| SAH Group |  |  |  |  | 6 |  | 33.3% |
| SAH+B12 Group |  |  |  |  | 6 |  | 33.3% |
